# Supplementary material for: 001 分娩前後における自己肯定感およびHLCの変化に関する研究 : 分娩に対する希望の有無を中心に(妊娠、分娩、産褥1)(第45回日本母性衛生学会総会学術集会)
Source: Royal Society of Chemistry journal article supplement (doi:10.1039/c0dt00252f), 2004-09-01
Supplement: c0dt00252f.pdf [file c0dt00252f.pdf]

# Metal mediated C-S rupture of heterocyclic thioamides : in situ generation of 2,2'-thio-di-2-imidazoline, 1,1'-dimethyl-2,2'-diimidazolylsulfide, $\text{SO}_4^{2-}$ and their variable coordination to $\text{Cu}^{\text{II}}$

**Tarlok S. Lobana,<sup>\*,†</sup> Razia Sultana,<sup>†</sup> Geeta Hundal,<sup>†</sup> Ray J. Butcher<sup>‡</sup>**

<sup>†</sup>Department of Chemistry, Guru Nanak Dev University, Amritsar – 143 005, India

<sup>‡</sup>Department of Chemistry, Howard University, Washington DC 20059, USA

## Experimental section

### Chemical reagents

Copper(I) halides (chloride and bromide) were prepared by reducing an aqueous solution of  $\text{CuSO}_4 \cdot 5\text{H}_2\text{O}$  using  $\text{SO}_2$  in the presence of  $\text{NaX}$  ( $X = \text{Cl}, \text{Br}$ ) in water.<sup>S1</sup> The ligands imidazolidine-2-thione and 1-methyl-1,3-imidazoline-2-thione were procured from Aldrich Chemicals Ltd and used as such.

### Techniques Used

Elemental Analysis: Elemental analysis for C, H and N were carried out using Thermoelectron FLASH EA 1112 analyzer.

IR: IR spectra were recorded using KBr pellets on a Pye–Unicam SP3-300 spectrophotometer.

UV-Visible: UV-visible spectra were recorded using UV-1601PC Shimadzu spectrophotometer.

Melting point: The melting points were determined with a Gallenkamp electrically heated apparatus.

Magnetic Susceptibility: It was recorded using Magnetic Susceptibility balance by Johnson Matthey, Catalytic Systems Division Equipment.

### Synthesis of complexes

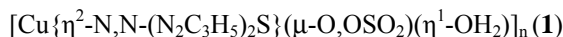

To a solution of copper(I) chloride (0.025 g, 0.24 mmol) in dimethyl sulfoxide was added a solution of imidazolidine-2-thione (0.025 g, 0.24 mmol) in dimethyl sulfoxide and the solution was kept undisturbed. After 4-5 weeks, the slow evaporation of solution at room temperature formed prismatic blue crystals of polymer **1**. Yield, 0.062 g, 70%, mp. 215-17 °C (melt). Found: C, 20.56; H, 3.4; N, 16.35; S 18.74. Calc. for  $\text{C}_6\text{H}_{12}\text{N}_4\text{O}_5\text{S}_2\text{Cu}$ : C, 20.7; H, 3.45; N, 16.1; S, 18.4%. Electronic absorption spectra [dmsO,  $\lambda_{\text{max}}$ , nm;  $\epsilon$  /  $\text{L mol}^{-1} \text{ cm}^{-1}$ ]:  $10^{-4}\text{M}$  solution: 266 ( $1.375 \times 10^3$ );  $10^{-3}\text{M}$  solution: very intense absorption in 266 nm region; 676 nm (132). IR absorptions: ( $\nu$  /  $\text{cm}^{-1}$ ) 3300-3200br (NH + OH), 3020-2900w (C-H), 1100w, 1020m ( $\nu_3$ ); 995m ( $\nu_1$ ) and 608s ( $\nu_4$ ) ( $\text{SO}_4$ ), 930m and 955m (C-S). Magnetic moment (BM): 1.975 per copper.

Copper(I) bromide gave the identical product.

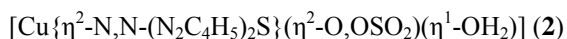

To a solution of copper(I) bromide (0.025 g, 0.17 mmol) in dimethyl sulfoxide was added a solution of 1-methyl-1,3-imidazoline-2-thione (0.020 g, 0.17 mmol) in dimethyl sulfoxide and the solution was kept undisturbed. After 5-6 weeks, the slow evaporation of solution at room temperature formed prismatic blue crystals of complex **2**. Yield, 0.046 g, 71%, mp. 195-97 °C (melt). Found: C, 25.57; H, 3.1; N, 15.2; S

17.42. Calc. for  $C_8H_{12}N_4O_5S_2Cu$ : C, 25.8; H, 3.2; N, 15.07; S, 17.2%. Electronic absorption spectra [dmsO,  $\lambda_{max}$ , nm;  $\epsilon$  /L mol<sup>-1</sup> cm<sup>-1</sup>]:  $10^{-4}$ M solution: 265 (1.372×10<sup>3</sup>);  $10^{-3}$ M solution: very intense absorption in 265 nm region; 675 nm (130). IR absorptions: ( $\nu$  / cm<sup>-1</sup>) 3300-3220br (NH + OH), 3015-2910w (C-H), 1105w, 1022m ( $\nu_3$ ); 990m ( $\nu_1$ ) and 610s ( $\nu_4$ ) (SO<sub>4</sub>), 940m and 950m (C-S). Magnetic moment (BM): 1.972 per copper.

[Cu<sub>2</sub>{ $\eta^2$ -N,N-(N<sub>2</sub>C<sub>4</sub>H<sub>5</sub>)<sub>2</sub>S}<sub>2</sub>}( $\mu$ -Cl)<sub>2</sub>Cl<sub>2</sub>] (**3**)

To a solution of copper(I) chloride (0.025 g, 0.25 mmol) in dimethyl sulfoxide was added a solution of 1-methyl-1, 3-imidazoline-2-thione (0.029 g, 0.25 mmol) in dimethyl sulfoxide and the solution was kept undisturbed. After 2-3 weeks, the slow evaporation of solution at room temperature formed prismatic green crystals of **3** along with blue crystalline product which was identified as CuSO<sub>4</sub>·5H<sub>2</sub>O. Yield, 0.046 g, 55%, mp. 233-237°C (melt). Found: C, 28.96; H, 3.26; N, 16.9; S, 9.55. Calc. for C<sub>16</sub>H<sub>20</sub>N<sub>8</sub>S<sub>2</sub>Cu<sub>2</sub>Cl<sub>4</sub>: C, 29.2; H, 3.0; N, 17.0; S, 9.73%. Electronic absorption spectra [dmsO,  $\lambda_{max}$ , nm;  $\epsilon$  /L mol<sup>-1</sup> cm<sup>-1</sup>]:  $10^{-4}$ M solution: 261 (2.889×10<sup>3</sup>);  $10^{-3}$ M solution: very intense absorption in 261 nm region; 739 nm (117). IR absorptions: ( $\nu$  / cm<sup>-1</sup>) 3157-3109s (N-H), 3026-2948w (C-H), 1525s, 1481s (C-N) +  $\delta$ (C-H), 948s (C=S), 763s  $\delta$ (N-CH<sub>3</sub>). Magnetic moment (BM): 1.966 per copper. Analytical data for the formation of CuSO<sub>4</sub>·5H<sub>2</sub>O. Found: H, 4.1; S, 13.17. Calc. for CuSO<sub>4</sub>·5H<sub>2</sub>O : H, 4.0; S, 12.8%.

Complex **3** can also be synthesized in CH<sub>3</sub>CN or CH<sub>3</sub>CN-CHCl<sub>3</sub> mixture.

### X-ray crystallography

The single crystals of compounds **1** - **3** were mounted on glass fibers and data were collected using Siemens P4 (**1**, **3**) and Xcalibur R (**2**) diffractometers, each equipped with a graphite monochromator and Mo-K $\alpha$  radiation ( $\lambda$  = 0.71073 Å). The unit cell dimensions and intensity data were measured at 295(2) (**1**), 123(2) (**2**) and 296(2) (**3**) K. The data were processed (data collection, refinement and reduction) with XSCANS<sup>S2</sup> and SHELXTL-PC (**1**, **3**)<sup>S3</sup> and CrysAlisPro (**2**). The structures were solved by direct methods using the program SIR-92 (**1**, **3**), SHELXS-97 (**2**) and refined by full-matrix least-squares techniques based on  $F^2$  using SHELXL-97<sup>S3</sup>. All non-hydrogen atoms have been refined anisotropically. The crystallographic data are given in Table 1 and bond lengths and angles in Table 2.

Table 1. Crystallographic data for complexes **1** - **3**.

|                                          | <b>1</b>                                                                      | <b>2</b>                                                                      | <b>3</b>                                                                                      |
|------------------------------------------|-------------------------------------------------------------------------------|-------------------------------------------------------------------------------|-----------------------------------------------------------------------------------------------|
| Empirical formula                        | C <sub>6</sub> H <sub>12</sub> CuN <sub>4</sub> O <sub>5</sub> S <sub>2</sub> | C <sub>8</sub> H <sub>12</sub> CuN <sub>4</sub> O <sub>5</sub> S <sub>2</sub> | C <sub>16</sub> H <sub>20</sub> Cl <sub>4</sub> Cu <sub>2</sub> N <sub>8</sub> S <sub>2</sub> |
| Formula weight                           | 347.86                                                                        | 371.88                                                                        | 657.44                                                                                        |
| T(K)                                     | 295(2)                                                                        | 123(2)                                                                        | 296(2)                                                                                        |
| Crystal system                           | Monoclinic                                                                    | Monoclinic                                                                    | Monoclinic                                                                                    |
| Space group                              | P2 <sub>1/n</sub>                                                             | P2 <sub>1/n</sub>                                                             | P2 <sub>1/n</sub>                                                                             |
| a(Å)                                     | 9.561(5)                                                                      | 7.2777(2)                                                                     | 9.053(1)                                                                                      |
| b(Å)                                     | 7.851(5)                                                                      | 16.8832(4)                                                                    | 8.402(1)                                                                                      |
| c(Å)                                     | 15.768(5)                                                                     | 10.6197(3)                                                                    | 15.754(3)                                                                                     |
| $\alpha = \gamma(^{\circ})$              | 90                                                                            | 90                                                                            | 90                                                                                            |
| $\beta(^{\circ})$                        | 98.490(5)                                                                     | 101.377(2)                                                                    | 94.28(1)                                                                                      |
| V (Å <sup>3</sup> )                      | 1170.6(10)                                                                    | 1279.21(6)                                                                    | 1195.0(3)                                                                                     |
| Z                                        | 4                                                                             | 4                                                                             | 2                                                                                             |
| D <sub>calcd</sub> (Mg m <sup>-3</sup> ) | 1.974                                                                         | 1.931                                                                         | 1.827                                                                                         |
| $\mu$ (mm <sup>-1</sup> )                | 2.242                                                                         | 2.059                                                                         | 2.425                                                                                         |

|                               |                  |                  |                  |
|-------------------------------|------------------|------------------|------------------|
| Reflections collected         | 2316             | 8698             | 2219             |
| Unique reflections,<br>R(int) | 2180, 0.0340     | 4243, 0.0244     | 1859, 0.0409     |
| Final R indices<br>R1<br>wR2  | 0.0334<br>0.0816 | 0.0273<br>0.0721 | 0.0344<br>0.0899 |

Table 2. Bond lengths (Å) and angles (°) for complexes **1** - **3**.

|             |            |             |            |
|-------------|------------|-------------|------------|
| <b>1</b>    |            |             |            |
| N2-Cu       | 1.969(3)   | O2-Cu       | 1.983(3)   |
| N3-Cu       | 1.946(3)   | O3-Cu       | 2.319(3)   |
| O1W-Cu      | 2.000(3)   |             |            |
| N3-Cu-N2    | 92.80(11)  | O1W-Cu-O3   | 87.89(11)  |
| N3-Cu-O2    | 92.80(11)  | N2-Cu-O3    | 101.52(11) |
| O2-Cu-O1W   | 89.92(11)  | O2-Cu-O3    | 95.00(12)  |
| N2-Cu-O1W   | 90.35(11)  | N3-Cu-O3    | 93.26(11)  |
| <b>2</b>    |            |             |            |
| Cu-N1       | 1.9520(13) | Cu-O1       | 2.0241(11) |
| Cu-N2       | 1.9638(13) | Cu-O2       | 2.0067(11) |
| Cu-O1W      | 2.1918(12) |             |            |
| N1-Cu-N2    | 93.87(5)   | N1-Cu-O1W   | 101.07(5)  |
| N2-Cu-O2    | 95.05(5)   | O1-Cu-O1W   | 93.93(5)   |
| O2-Cu-O1    | 71.08(4)   | N2-Cu-O1W   | 103.31(5)  |
| N1-Cu-O1    | 95.07(5)   | O2-Cu-O1W   | 93.66(5)   |
| <b>3</b>    |            |             |            |
| Cu-Cl1      | 2.2931(9)  | Cu-N1       | 2.026(3)   |
| Cu-Cl1#     | 2.7159(10) | Cu-N3       | 2.005(3)   |
| Cu-Cl2      | 2.2624(10) |             |            |
| Cl1-Cu-Cl1# | 86.33(3)   | N1-Cu-Cl1#  | 100.45(8)  |
| Cu-Cl1-Cu#  | 93.67(3)   | Cl2-Cu-Cl1  | 93.37(3)   |
| N3-Cu-N1    | 86.94(11)  | N3-Cu-Cl2   | 89.62(8)   |
| N3-Cu-Cl1   | 175.99(8)  | Cl2-Cu-Cl1# | 102.87(3)  |

## References

- S1 G. Brauer, Handbook of Preparative Chemistry, 2nd ed., vol. 2, Academic Press, New York, 1965.  
 S2 XSCANS, Siemens Analytical X-ray Instruments Inc., Madison, WI, USA, 1994.  
 S3 G. M. Sheldrick. *Acta Crystallogr.* 2008, **A64**, 112-122.

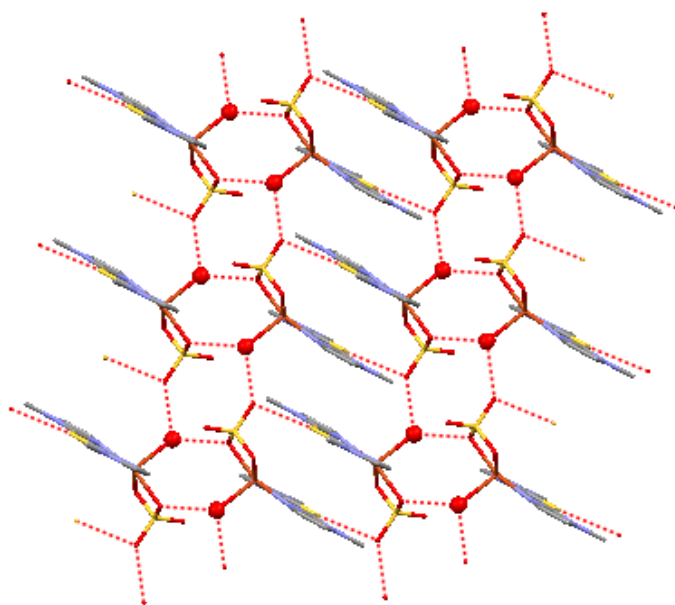

Fig. S1. Showing H-bonding contacts in complex 2. ( $O1W-H1W1...O3^i$ , 2.743 (2) Å,  $H1W1...O3^i$  1.94 Å,  $O1W-H1W1...O3^i$   $\angle$  167°,  $O1W-H1W2...O2^{ii}$ , 2.763(3) Å,  $H1W2...O2^{ii}$  1.98 Å,  $O1W-H1W2...O2^{ii}$   $\angle$  174°,  $O3...S^{iii}$  3.219 Å, where  $i = -1+x,y,z$ ;  $ii = 1-x,1-y,2-z$ ;  $iii = -x,1-y,1-z$ )

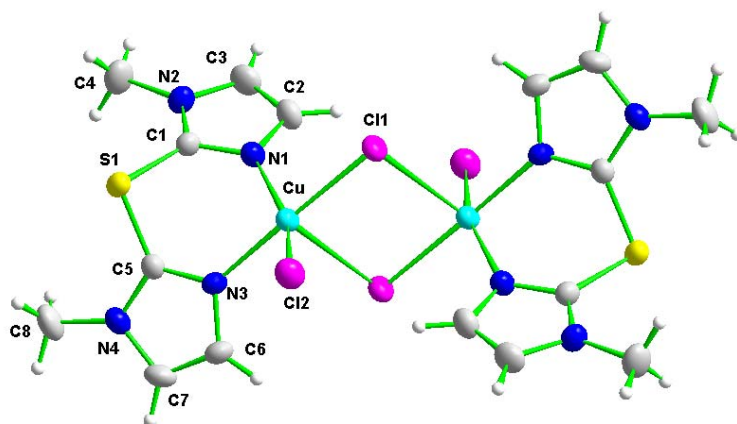

Fig. S2. Molecular structure of complex 3. Selected bond lengths (Å) and angles (°): Cu-Cl1 2.293(1), Cu-Cl1# 2.716(1), Cu-Cl2 2.262(1), Cu-N1 2.026(3) and Cl1-Cu-Cl1# 86.33(3), Cu-Cl1-Cu# 93.67(3), Cl2-Cu-Cl1 93.37(3), N3-Cu-N1 86.94(11).
